# Supplementary material for: Ultralong hydroxyapatite nanowire-based layered catalytic paper for highly efficient continuous flow reactions
Source: Royal Society of Chemistry journal article supplement (doi:10.1039/c7ta11215g), 2018-01-01
Supplement: c7ta11215g1.pdf [file c7ta11215g1.pdf]

## Supporting Information

### **Ultralong Hydroxyapatite Nanowire-Based Layered Catalytic Paper for Highly Efficient Continuous Flow Reactions**

Zhi-Chao Xiong,<sup>a</sup> Zi-Yue Yang,<sup>b</sup> Ying-Jie Zhu,<sup>\*a</sup> Fei-Fei Chen,<sup>a</sup> Ri-Long Yang,<sup>a</sup> and Dong-Dong Qin<sup>a</sup>

<sup>a</sup> State Key Laboratory of High Performance Ceramics and Superfine Microstructure, Shanghai Institute of Ceramics, Chinese Academy of Sciences, Shanghai 200050, China

<sup>b</sup> Sino-German College of Technology, East China University of Science and Technology, Shanghai 200237, China

\* Corresponding author:

Professor Ying-Jie Zhu, E-mail: [y.j.zhu@mail.sic.ac.cn](mailto:y.j.zhu@mail.sic.ac.cn); Tel: 0086-21-52412616;

Fax: 0086-21-52413122

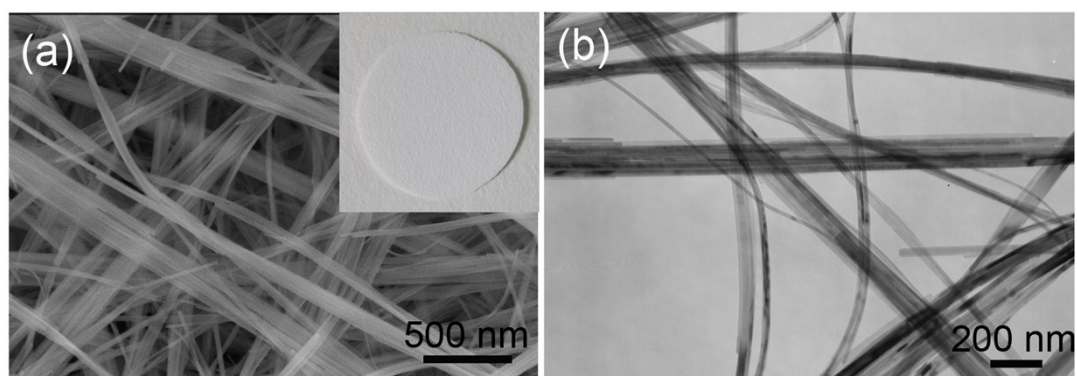

**Fig. S1** (a) SEM micrograph and (b) TEM micrograph of ultralong hydroxyapatite nanowires (HAPNWs). Inset is a digital image of the highly flexible fire-resistant HAPNW paper with a diameter of 4 cm.

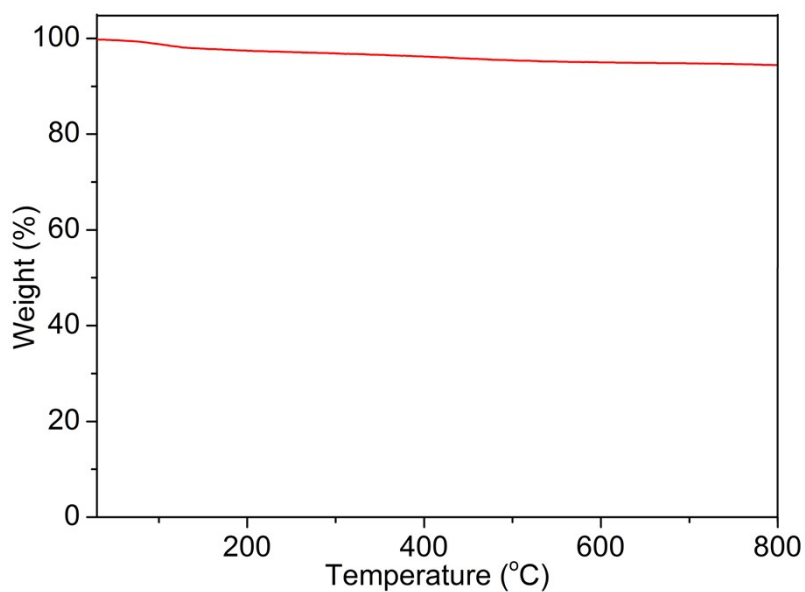

**Fig. S2** TG curve of the as-prepared HAPNW/AuNP layered catalytic paper.

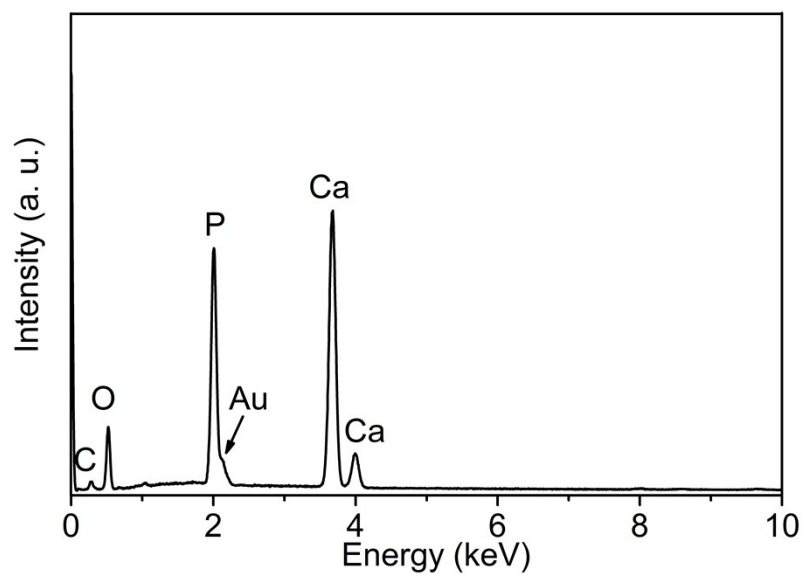

**Fig. S3** EDS pattern of the as-prepared HAPNW/AuNP layered catalytic paper.

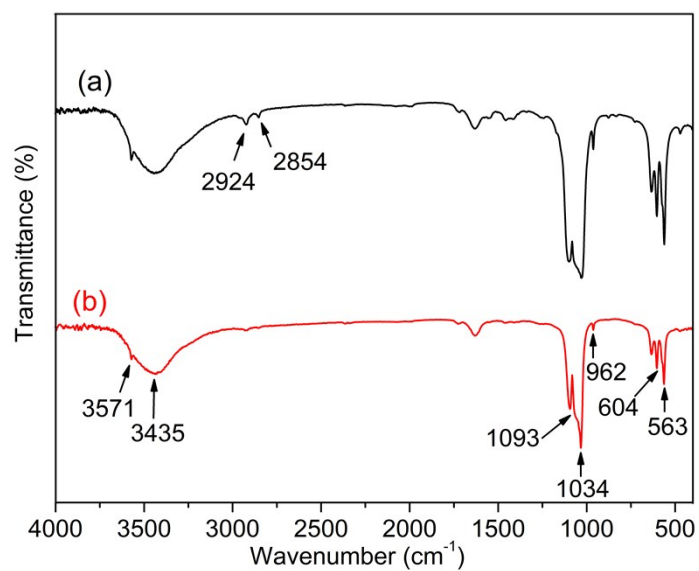

**Fig. S4** FTIR spectra: (a) HAPNWs with adsorbed oleic acid molecules, and (b) the heat-treated HAPNWs at 600 °C for 4 h.

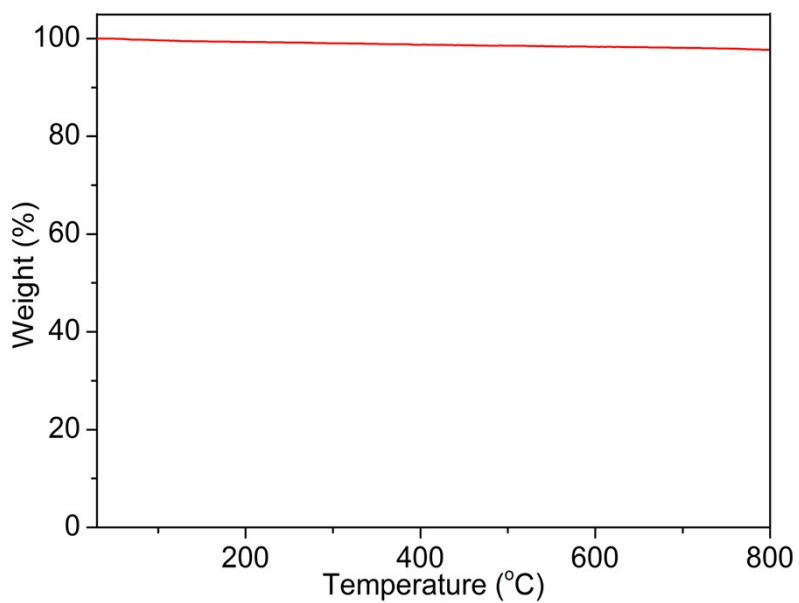

**Fig. S5** TG curve of the heat-treated HAPNWs at 600 °C for 4 h.

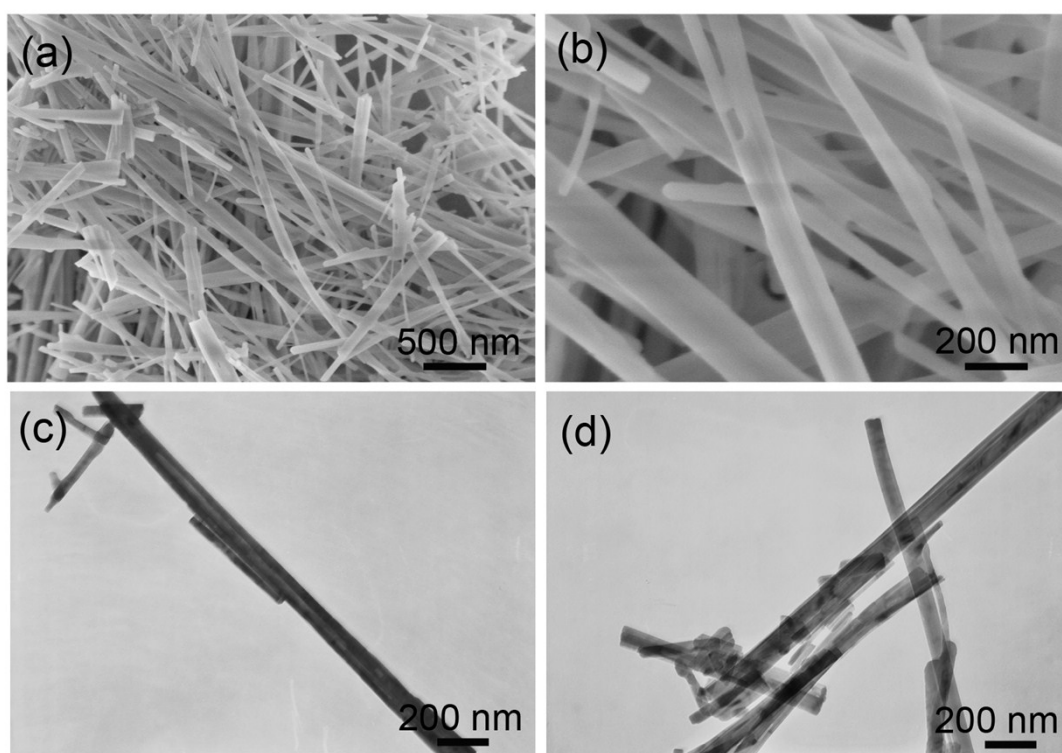

**Fig. S6** (a, b) SEM micrographs and (c, d) TEM micrographs of the product prepared using the heat-treated HAPNWs and tetrachloroauric (III) acid aqueous solution at room temperature without additional reducing reagent. The experiments show no formation of AuNPs on the surface of HAPNWs.

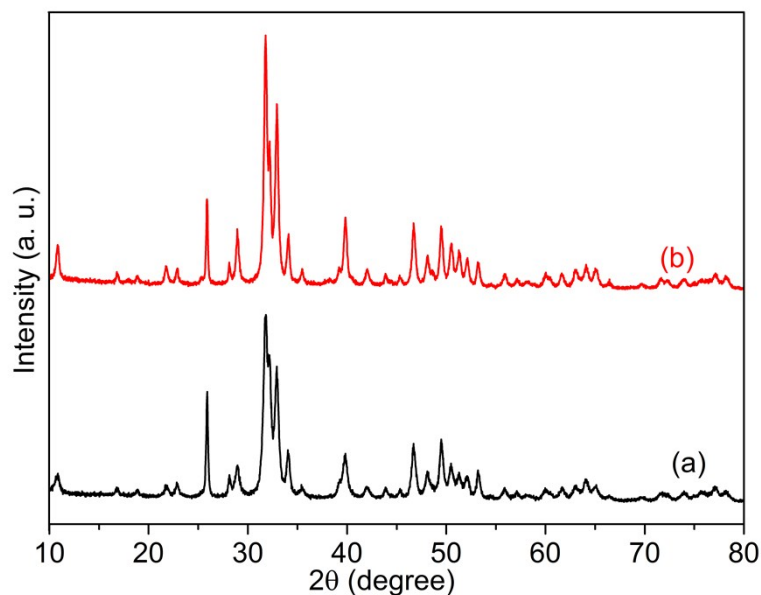

**Fig. S7** XRD patterns: (a) HAPNWs; (b) the product prepared using the heat-treated HAPNWs and tetrachloroauric (III) acid aqueous solution at room temperature without additional reducing reagent, indicating that no Au peaks are obviously observed.

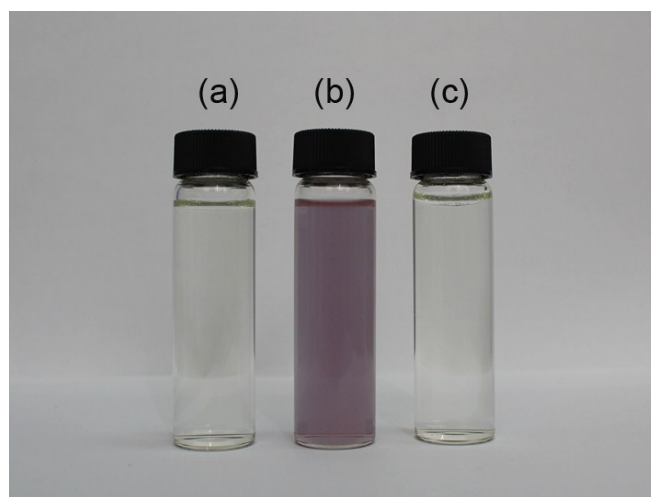

**Fig. S8** Digital images. (a) The initial tetrachloroauric (III) acid aqueous solution; (b) the mixed aqueous solution containing sodium oleate and tetrachloroauric (III) acid after stirring for 12 h at room temperature; (c) the mixed aqueous solution containing sodium stearate and tetrachloroauric (III) acid after stirring for 12 h at room temperature. The experiments show that sodium oleate can reduce Au (III) to AuNPs in aqueous solution at room temperature.

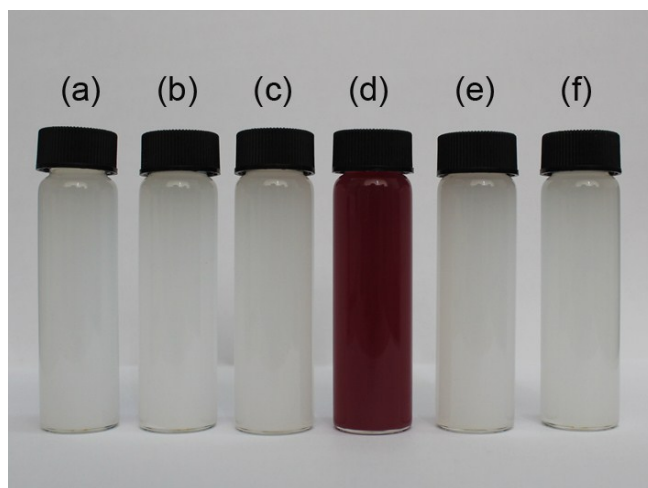

**Fig. S9** Digital images. (a) The aqueous suspension containing the heat-treated HAPNWs; (b) the aqueous suspension containing the heat-treated HAPNWs and tetrachloroauric (III) acid after stirring for 12 h at room temperature; (c) the aqueous suspension containing sodium oleate modified heat-treated HAPNWs; (d) the aqueous suspension containing sodium oleate modified heat-treated HAPNWs and tetrachloroauric (III) acid after stirring for 12 h at room temperature; (e) the aqueous suspension containing sodium stearate modified heat-treated HAPNWs; (f) the aqueous suspension containing sodium stearate modified heat-treated HAPNWs and tetrachloroauric (III) acid after stirring for 12 h at room temperature.

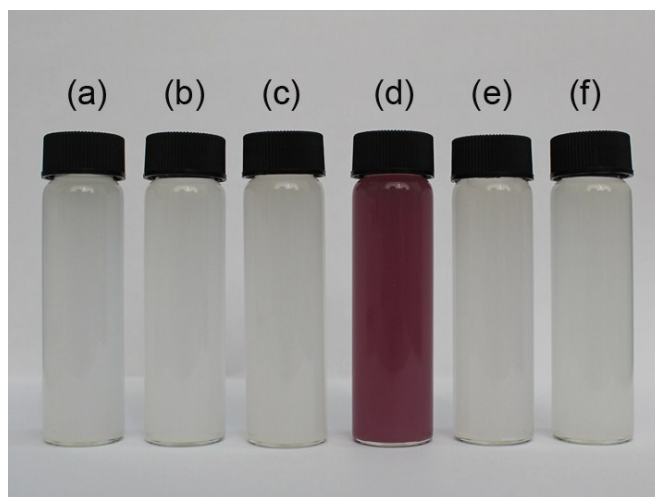

**Fig. S10** Digital images. (a) The aqueous suspension containing the commercial HAP particles; (b) the aqueous suspension containing commercial HAP particles and tetrachloroauric (III) acid after stirring for 12 h at room temperature; (c) the aqueous suspension containing sodium oleate modified commercial HAP particles; (d) the aqueous suspension containing sodium oleate modified commercial HAP particles and tetrachloroauric (III) acid after stirring for 12 h at room temperature; (e) the aqueous suspension containing sodium stearate modified commercial HAP particles; (f) the aqueous suspension containing sodium stearate modified commercial HAP particles and tetrachloroauric (III) acid after stirring for 12 h at room temperature.

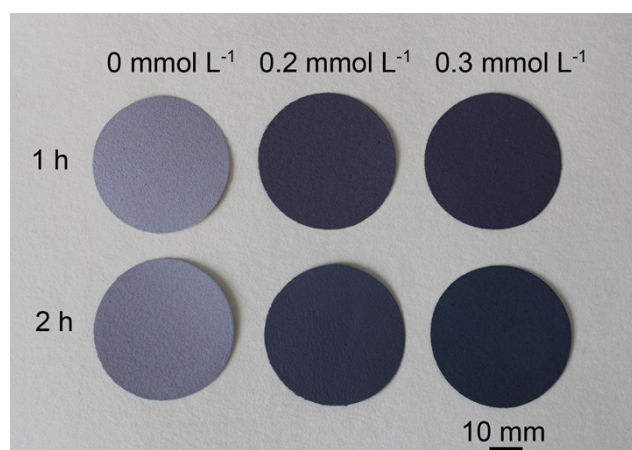

**Fig. S11** Digital images of the HAPNW/AuNP layered catalytic paper sheets prepared using the aqueous suspension containing HAPNWs and tetrachloroauric (III) acid in the presence of ferrous sulfate with different molar concentrations for different reaction times.

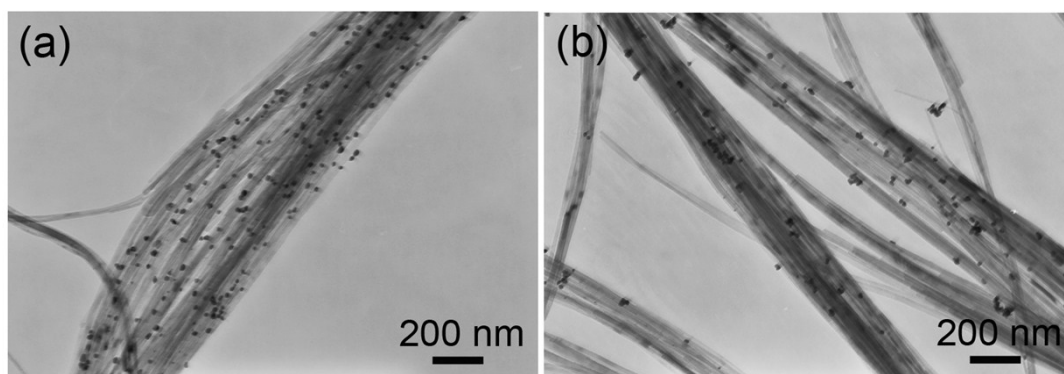

**Fig. S12** TEM images of the as-prepared AuNPs-loaded HAPNWs after immersion in ethanol (a) and deionized water (b) for three months, respectively.



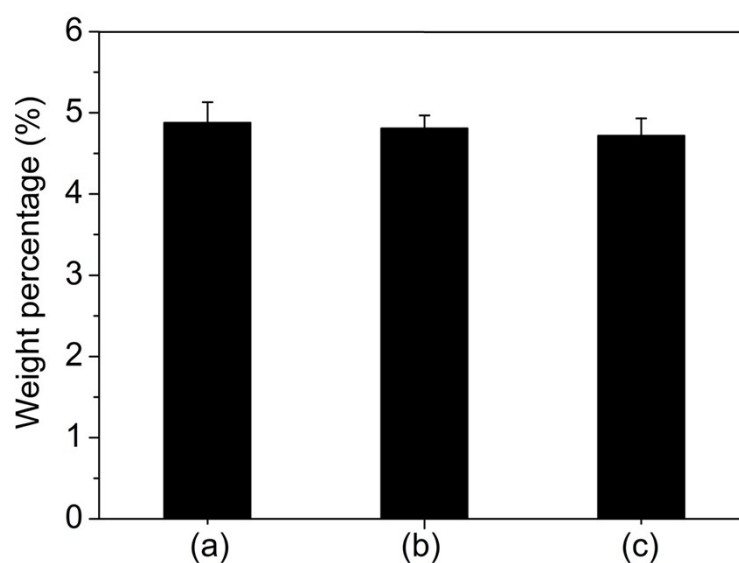

**Fig. S13** The AuNP weight percentage obtained by the ICP analysis of the as-prepared AuNPs-loaded HAPNWs before (a) and after immersion in ethanol (b) and deionized water (c) for three months, respectively.

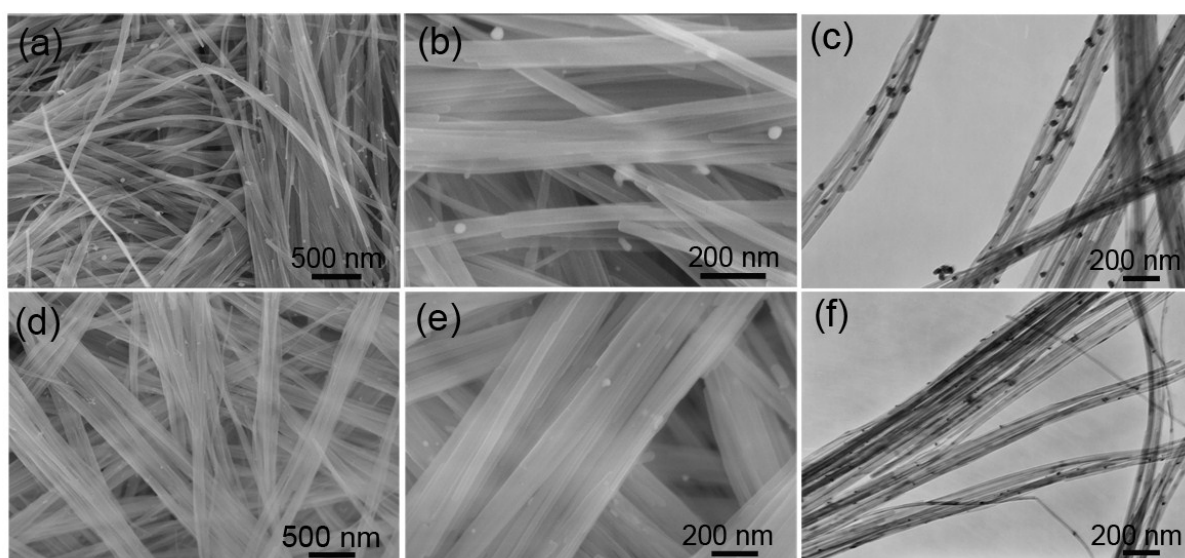

**Fig. S14** SEM micrographs (a, b, d, e) and TEM micrographs (c, f) of different kinds of the HAPNW/AuNP samples. (a–c) The H-HAPNW/AuNP sample, (d–f) the L-HAPNW/AuNP sample. The SEM and TEM micrographs of the M-HAPNW/AuNP sample are shown in Fig. 1b–1d.

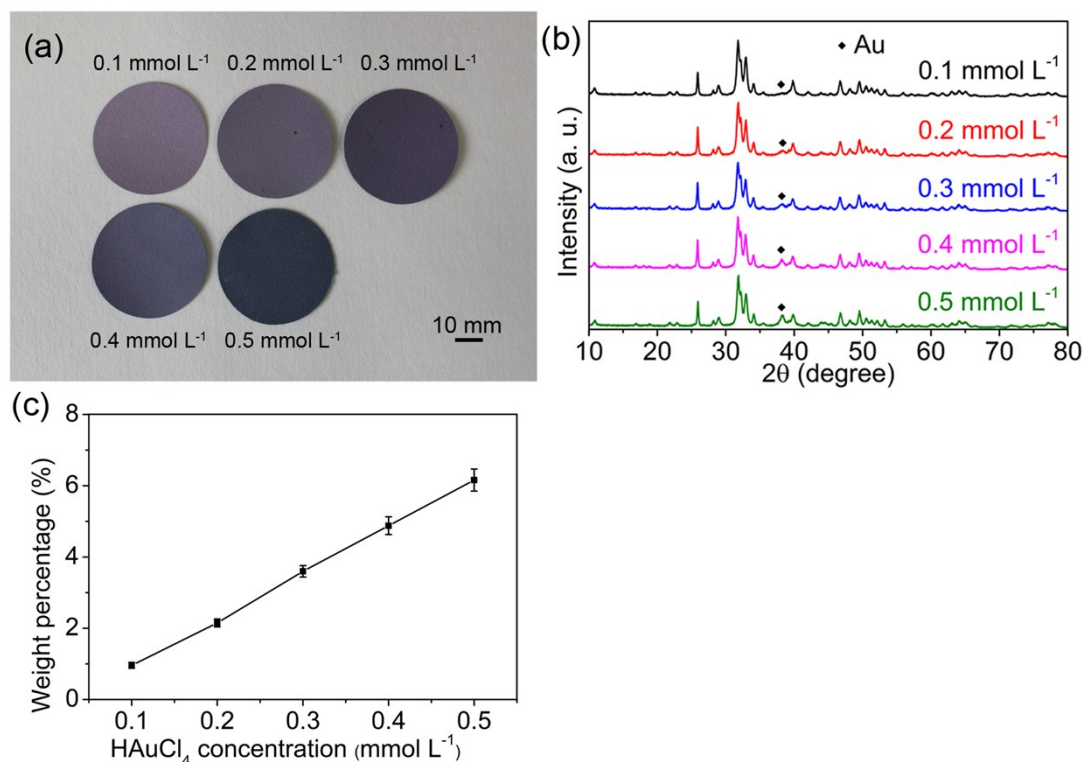

**Fig. S15** (a) Digital images, (b) XRD patterns, and (c) ICP analysis results of the AuNP weight percentage of the HAPNW/AuNP layered catalytic paper sheets prepared at different molar concentrations of tetrachloroauric (III) acid in the reaction system ranging from 0.1 to 0.5 mmol L<sup>-1</sup> for 12 h at room temperature.

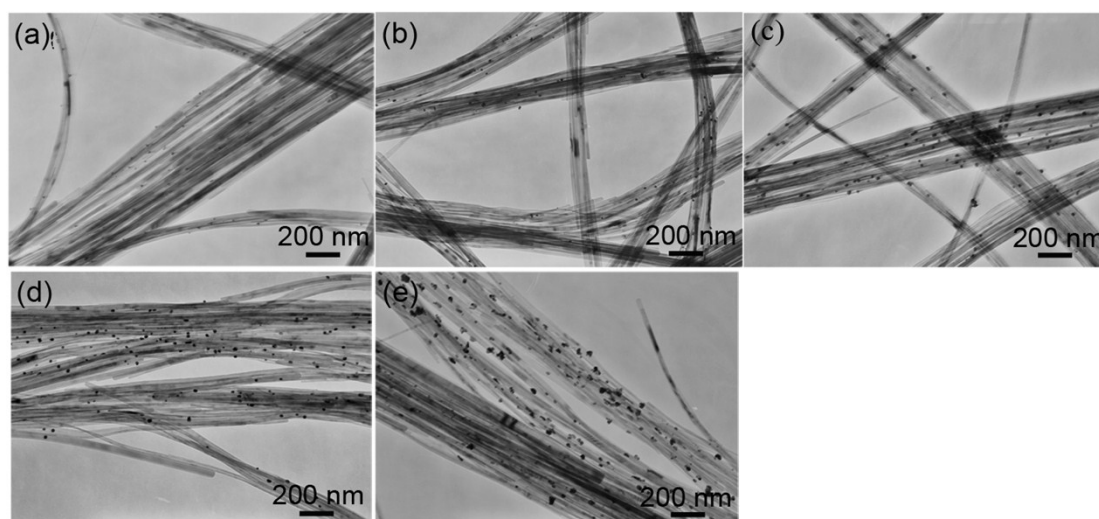

**Fig. S16** TEM micrographs of the AuNPs-loaded HAPNWs prepared at different molar concentrations of tetrachloroauric (III) acid in the reaction system for 12 h at room temperature: (a) 0.1 mmol L<sup>-1</sup>, (b) 0.2 mmol L<sup>-1</sup>, (c) 0.3 mmol L<sup>-1</sup>, (d) 0.4 mmol L<sup>-1</sup>, and (e) 0.5 mmol L<sup>-1</sup>.

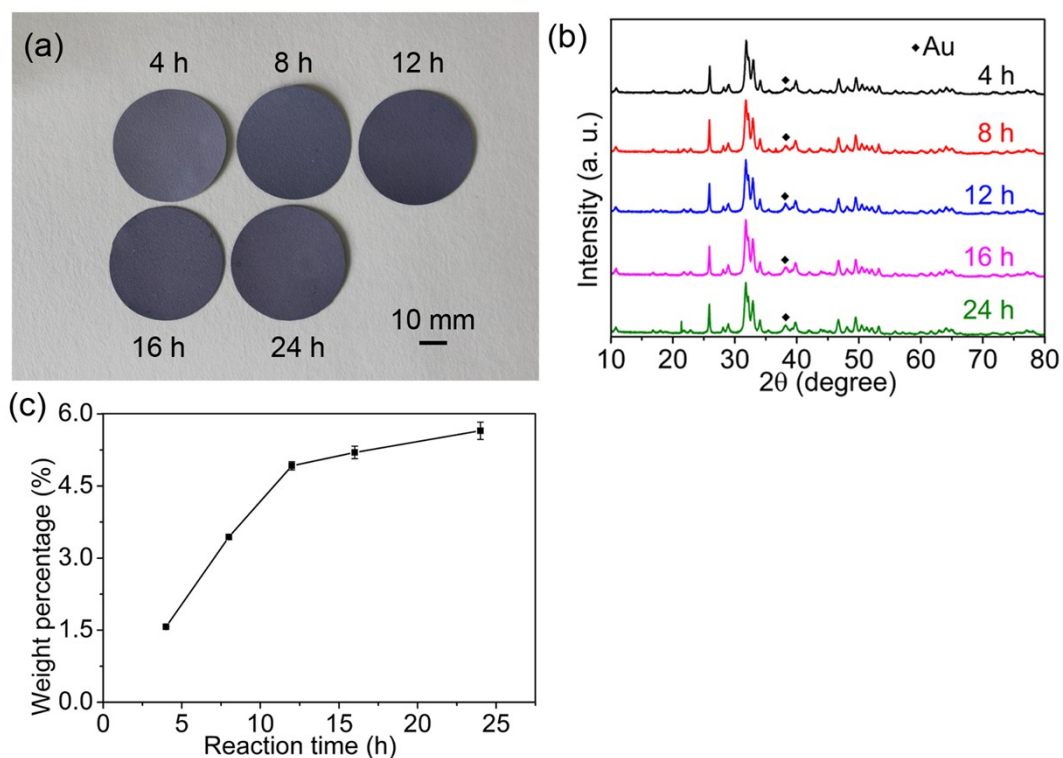

**Fig. S17** The HAPNW/AuNP layered catalytic paper sheets prepared using tetrachloroauric (III) acid ( $3296 \mu\text{L}$ ,  $5 \text{ mg mL}^{-1}$ ) for different reaction times ranging from 4 to 24 h at room temperature: (a) digital images, (b) XRD patterns, and (c) ICP analysis results of the AuNP weight percentage.

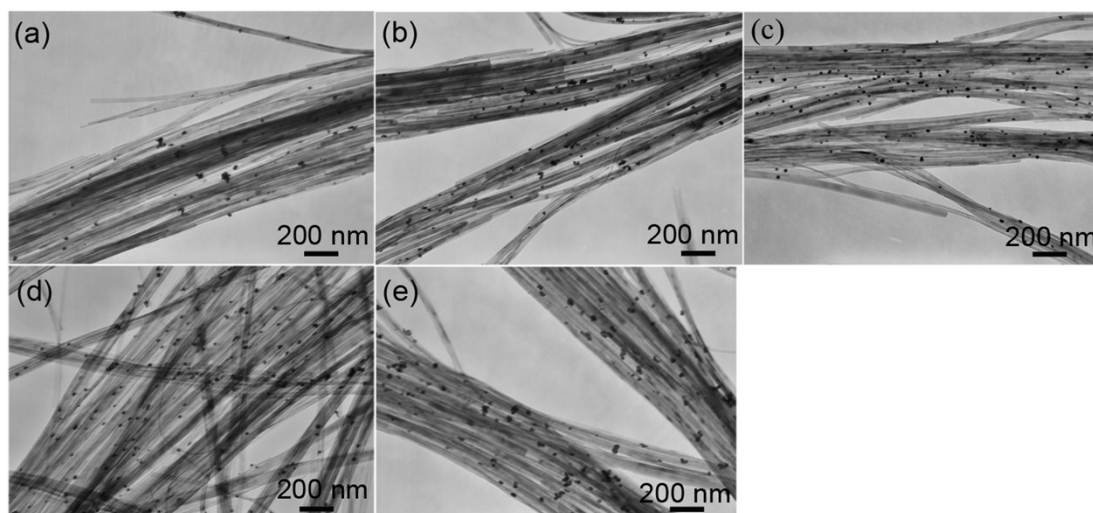

**Fig. S18** TEM micrographs of the AuNPs-loaded HAPNWs prepared using tetrachloroauric (III) acid ( $3296 \mu\text{L}$ ,  $5 \text{ mg mL}^{-1}$ ) for different reaction times at room temperature: (a) 4 h, (b) 8 h, (c) 12 h, (d) 16 h and (e) 24 h.

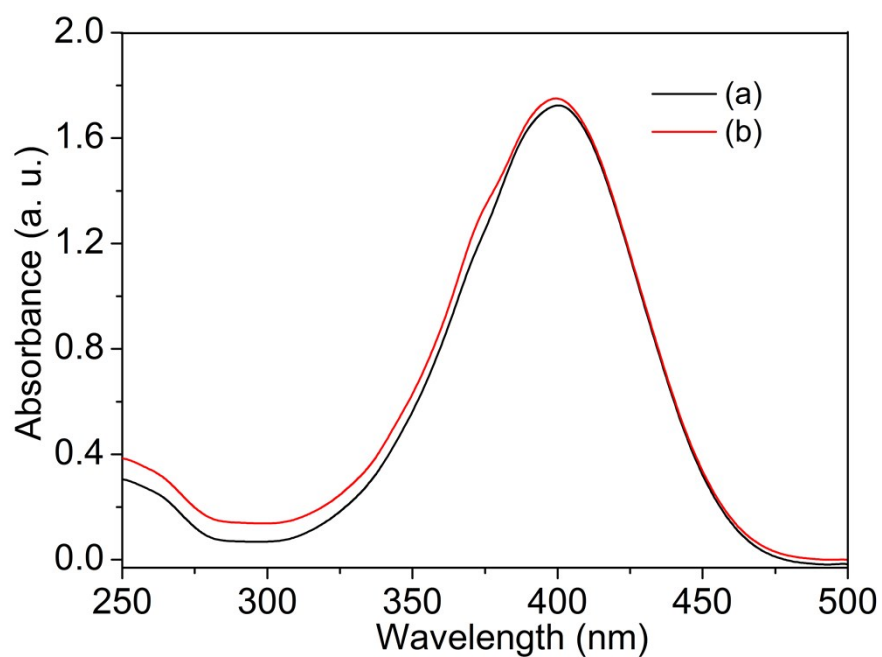

**Fig. S19** UV-vis absorption spectra of an aqueous solution containing 4-NP and  $\text{NaBH}_4$  before (a) and after (b) flowing through the HAPNW paper without loading AuNPs.

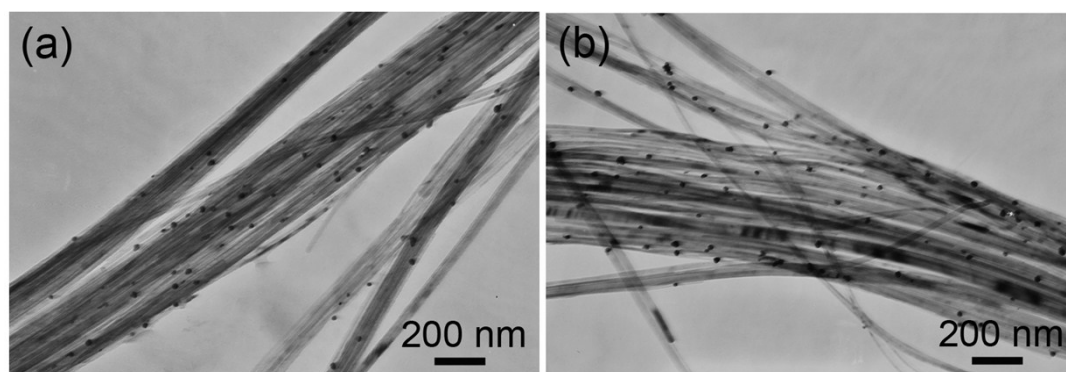

**Fig. S20** (a, b) TEM micrographs of the AuNPs-loaded HAPNWs from the HAPNW/AuNP layered catalytic paper after the continuous flow catalytic reaction for about 200 h.



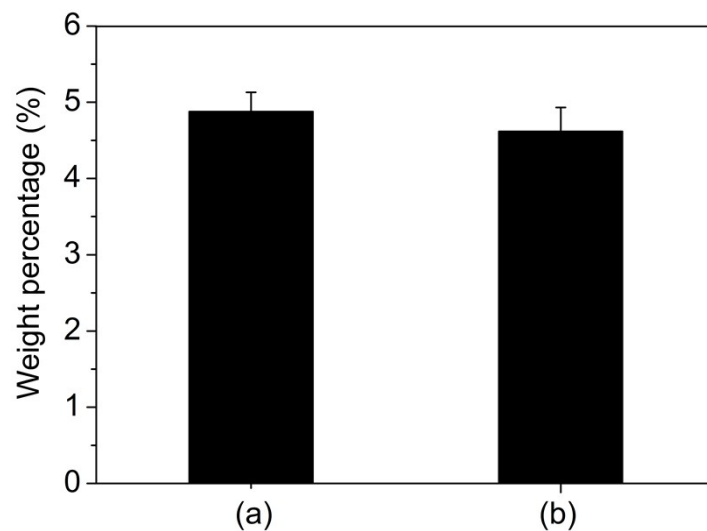

**Fig. S21** ICP analysis results of the AuNP weight percentage of the HAPNW/AuNP layered catalytic paper before (a) and after (b) the continuous flow catalytic reaction for about 200 h.

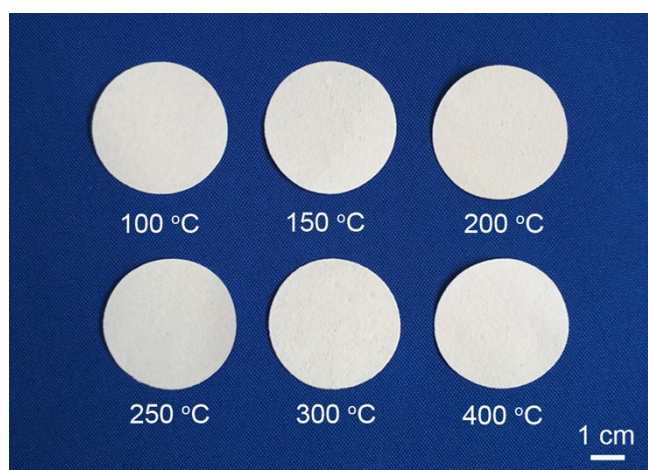

**Fig. S22** Digital images of the HAPNW paper sheets after heat treatment at different temperatures for 1 h.

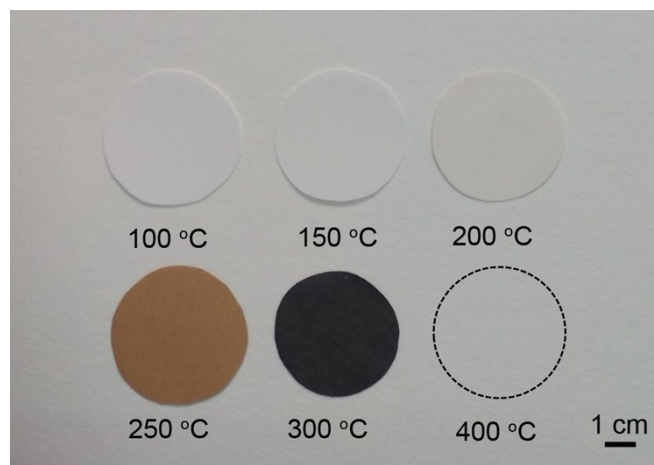

**Fig. S23** Digital images of the commercial filter paper sheets after heat treatment at different temperatures for 1 h. The filter paper is completely burned off at 400 °C for 1 h.

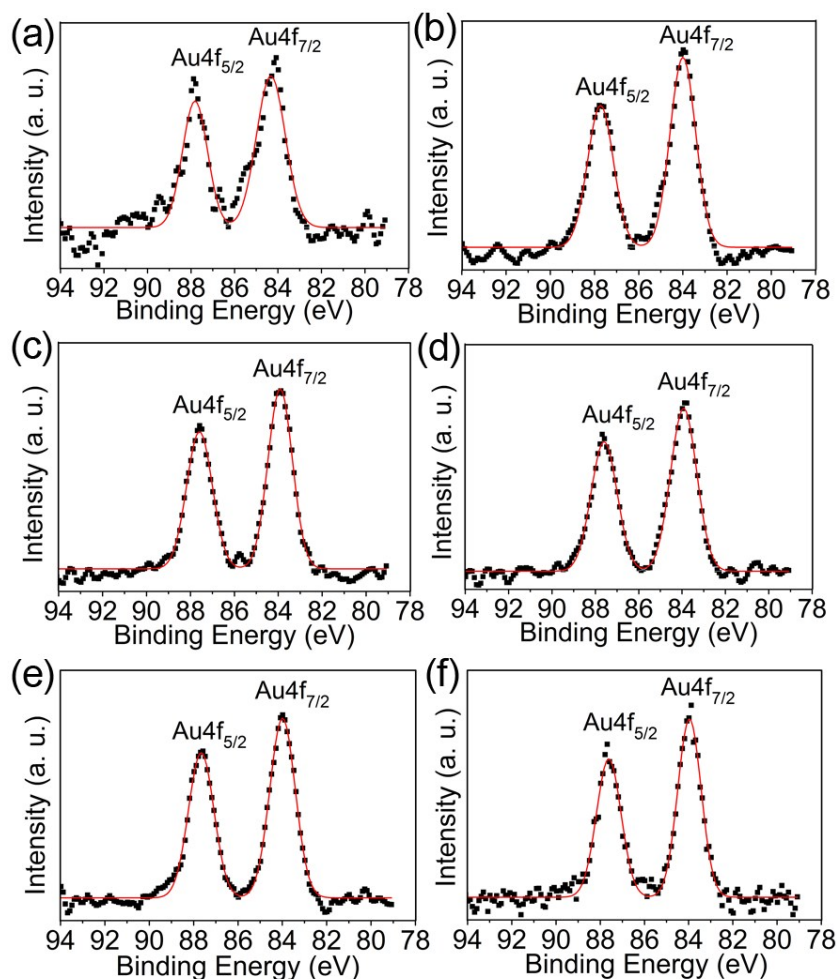

**Fig. S24** XPS patterns of the HAPNW/AuNP layered catalytic paper sheets after heat treatment at different temperatures for 1 h: (a) 100 °C, (b) 150 °C, (c) 200 °C, (d) 250 °C, (e) 300 °C, and (f) 400 °C.

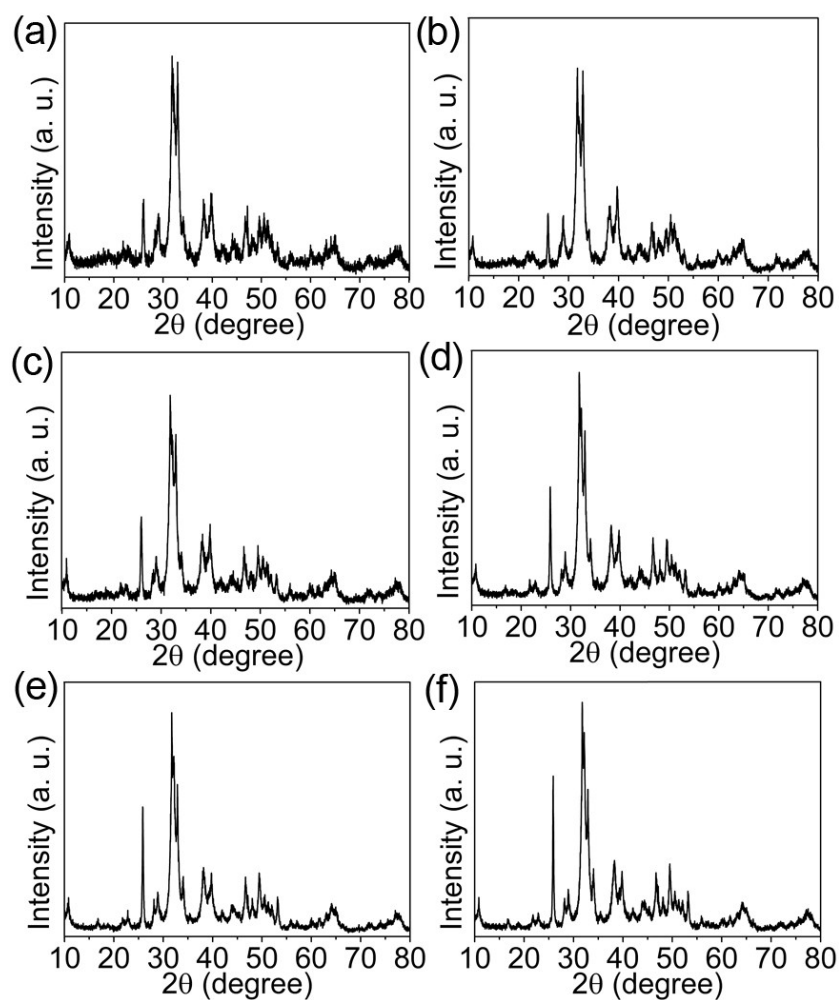

**Fig. S25** XRD patterns of the HAPNW/AuNP layered catalytic paper sheets after heat treatment at different temperatures for 1 h: (a) 100 °C, (b) 150 °C, (c) 200 °C, (d) 250 °C, (e) 300 °C, and (f) 400 °C.

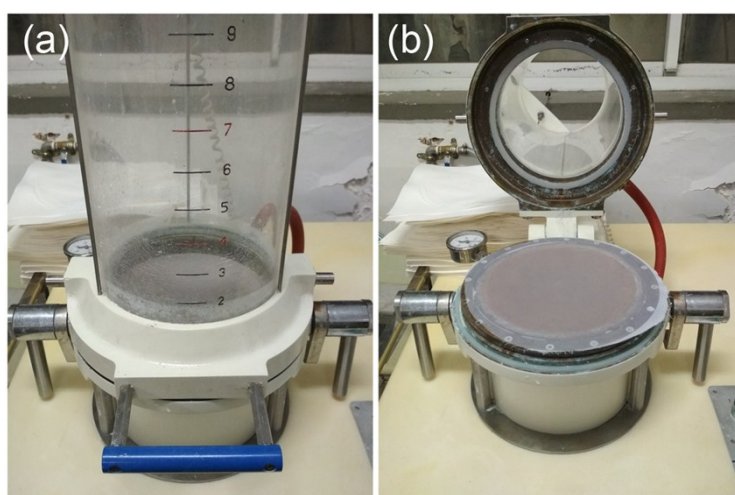

**Fig. S26** A commercial paper sheet former used for the preparation of the large-sized HAPNW/AuNP layered catalytic paper with a diameter of 20 cm.
